# Supplementary material for: Boosting the dielectric and electrical performance of perovskite materials by collaborative augmentation with reduced graphene oxide nanosheets for cutting-edge storage solutions
Source: Royal Society of Chemistry journal article supplement (doi:10.1039/d4tc03022b), 2024-01-01
Supplement: d4tc03022b1.pdf [file d4tc03022b1.pdf]

**Boosting Dielectric and Electrical Performance of Perovskite Material by Collaborative Augmentation with Reduced Graphene Oxide Nanosheets for Cutting-edge Storage Solutions.**

Rajanigandha Barik<sup>a</sup>, Priyanka Sahu<sup>a</sup>, Smrutirekha Sahoo<sup>a</sup>, Madhusmita Bhuyan<sup>a</sup>, Soumen Dhara<sup>b</sup>, Dibakar Sahoo<sup>a\*</sup>

<sup>a</sup>School of Physics, Sambalpur University, Jyoti Vihar, Burla, Odisha 768019, India

<sup>b</sup>School of Applied Science, Kalinga Institute of Industrial Technology, Bhubaneswar - 751024, Odisha, India.

**Authors Information**

**\*Corresponding author.**

**Email address:** iamdibakar@suniv.ac.in (D. Sahoo)

## Table of content:

- 1) EDAX images of (a) MAPbI<sub>3</sub>,(b) MAPbI<sub>3</sub>@1rGO,(c) MAPbI<sub>3</sub>@5rGO
- 2) High-resolution Pb 1s peaks and fitting curves of the composites
- 3) High-resolution O 1s peaks and fitting curves of the composites
- 4) Variation of real parts of impedance versus imaginary parts of impedance of parent and composites at different temperatures.
- 5) Variation of real parts of impedance versus imaginary parts of impedance of parent and composites at high temperatures at 50°C.
- 6) Jonscher's power law fitting of conductivity as a function of frequency
- 7) Table T1. exponent ('n')value and Activation energy from Jonscher's power law, relaxation time for complex parts of the impedance of parent and composite material.
- 8) XRD, FTIR, Raman, UV-VIS, Emission spectra of rGO and MAPbI<sub>3</sub>@rGo composites

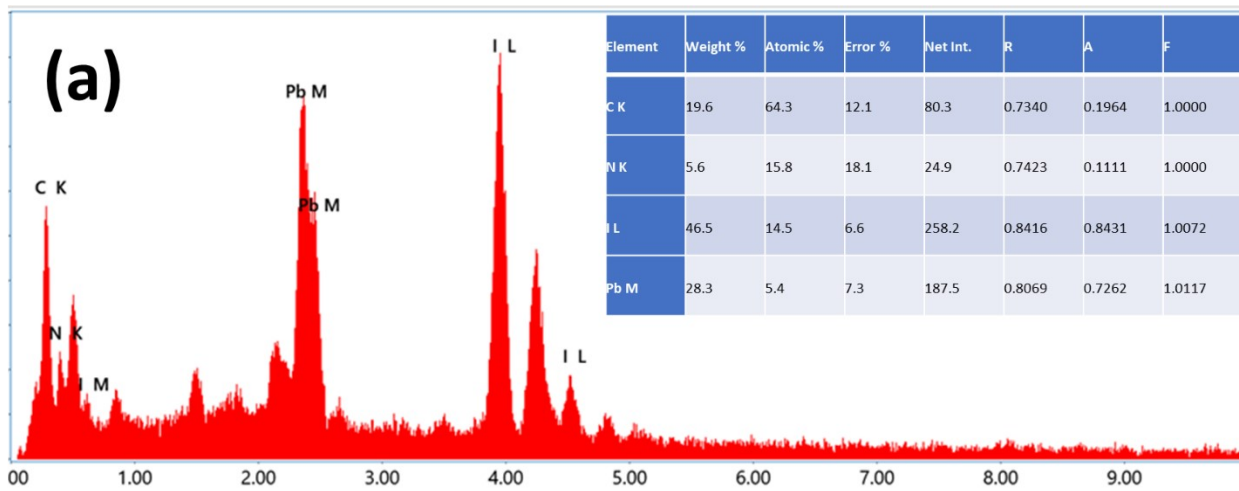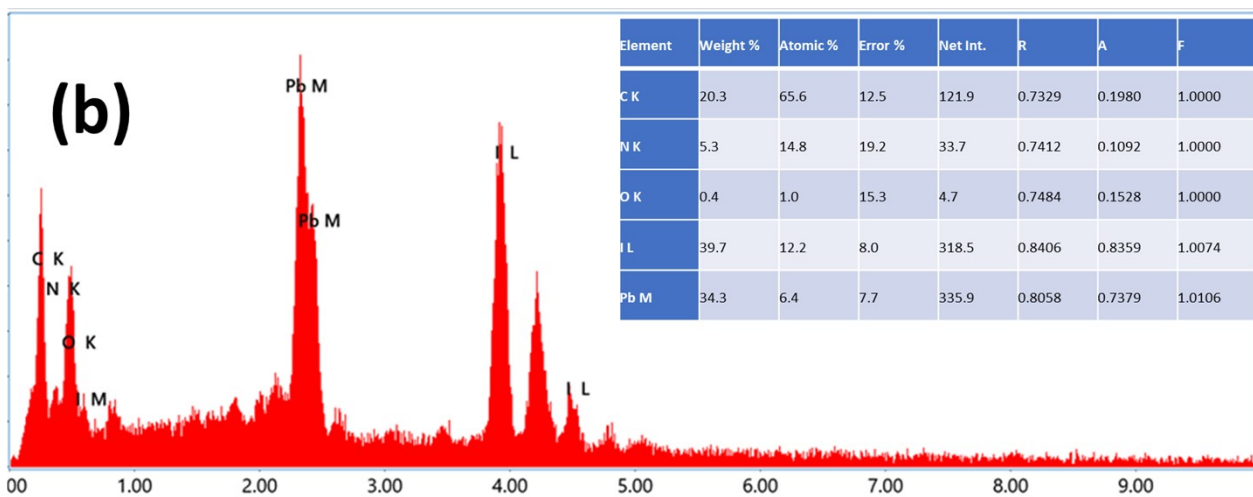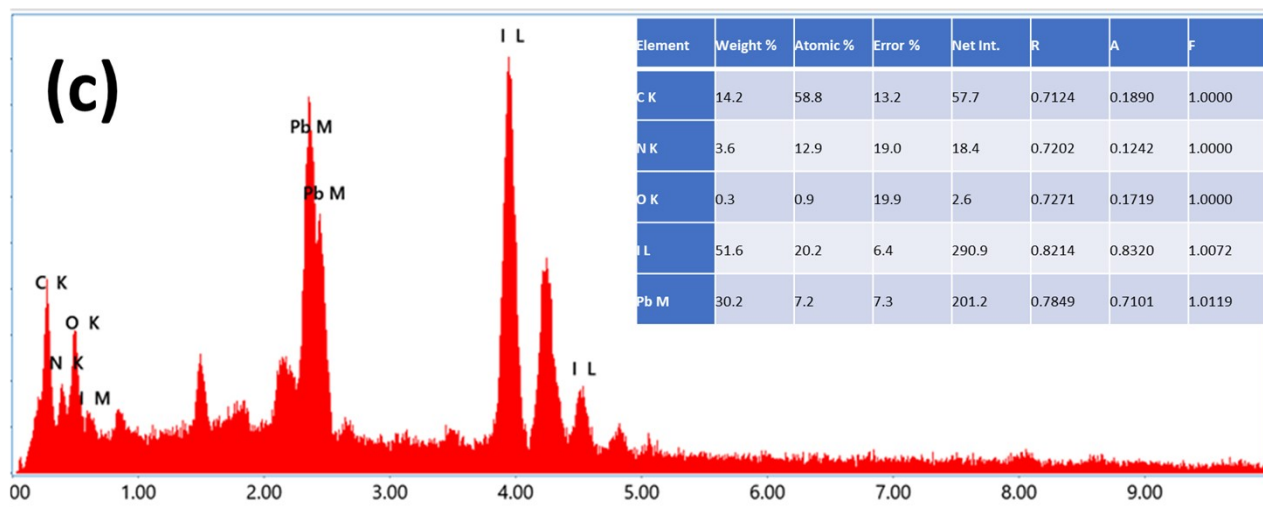

**Figure S1.** EDAX value of (a) MAPbI<sub>3</sub> (b) MAPbI<sub>3</sub>@1rGO (c) MAPbI<sub>3</sub>@5rGO

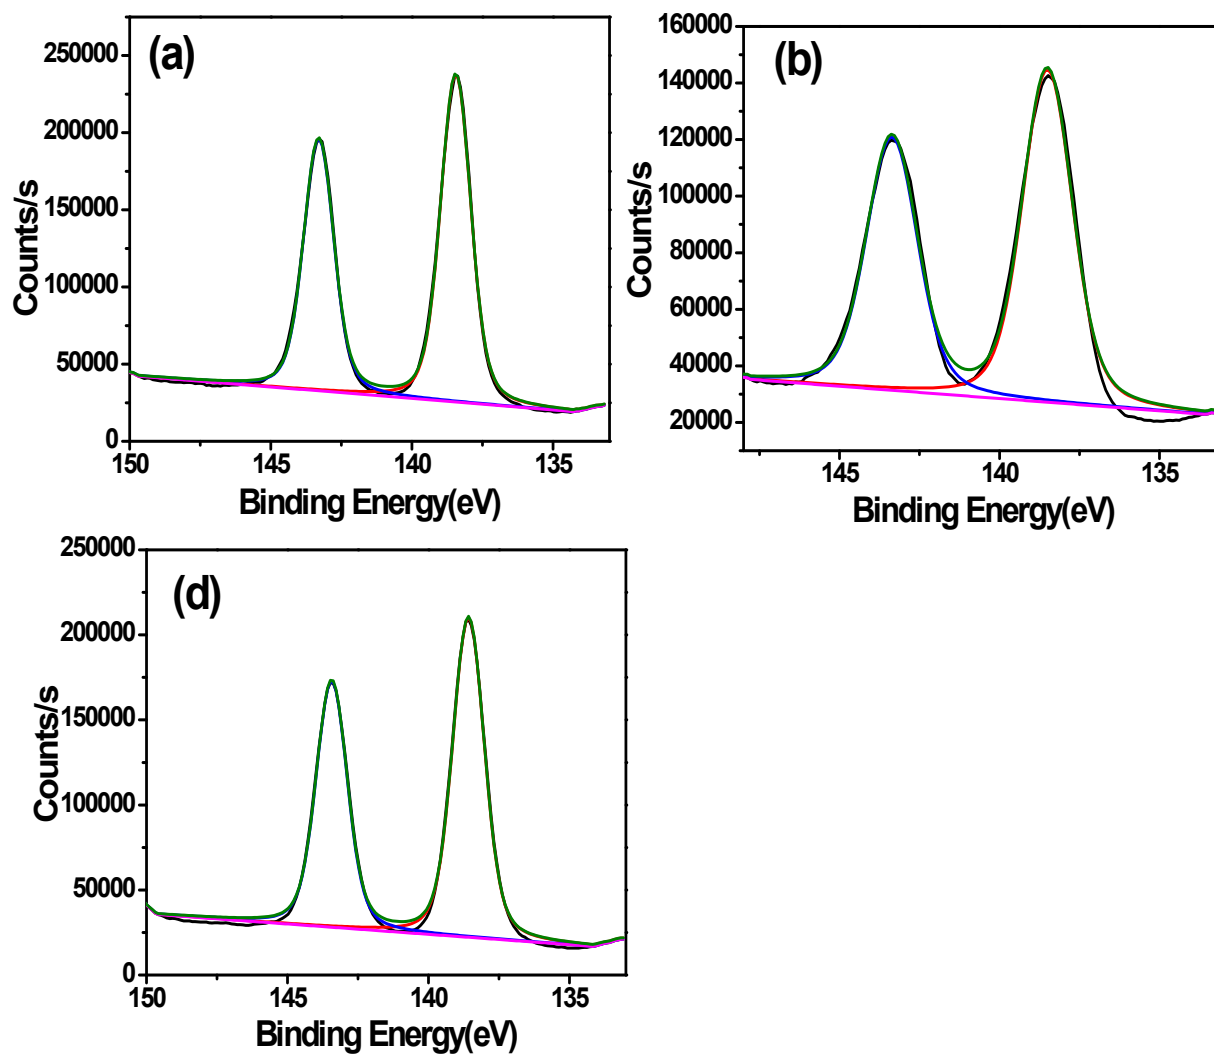

**Figure S2.** high-resolution Pb 1s peaks and fitting curves of (a) MAPbI<sub>3</sub>@1rGO (b) MAPbI<sub>3</sub>@5rGO, (c) MAPbI<sub>3</sub>@7rGO

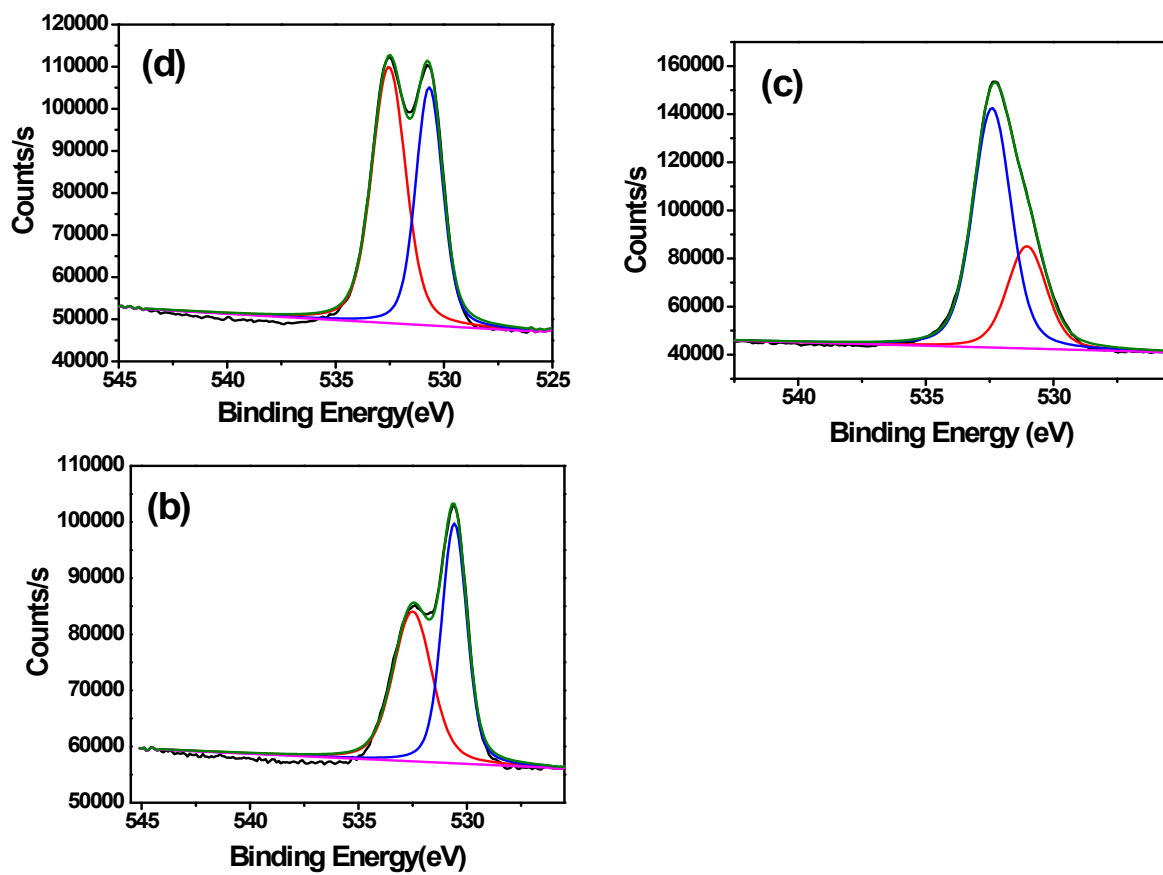

**Figure S3.** High-resolution O 1s peaks and fitting curves of (a) MAPbI<sub>3</sub>@1rGO, (b) MAPbI<sub>3</sub>@5rGO, (c) MAPbI<sub>3</sub>@7rGO

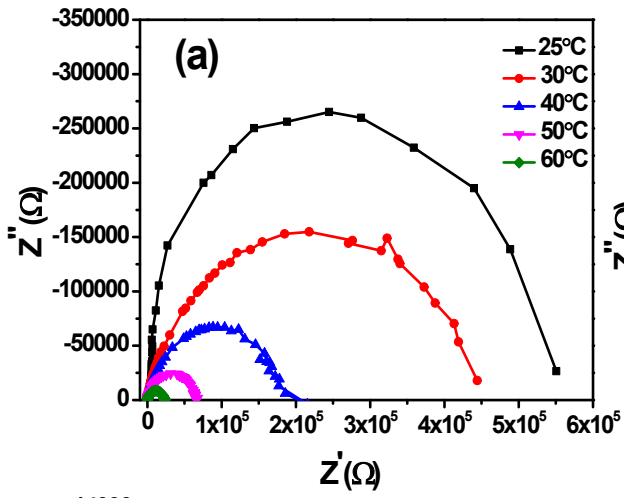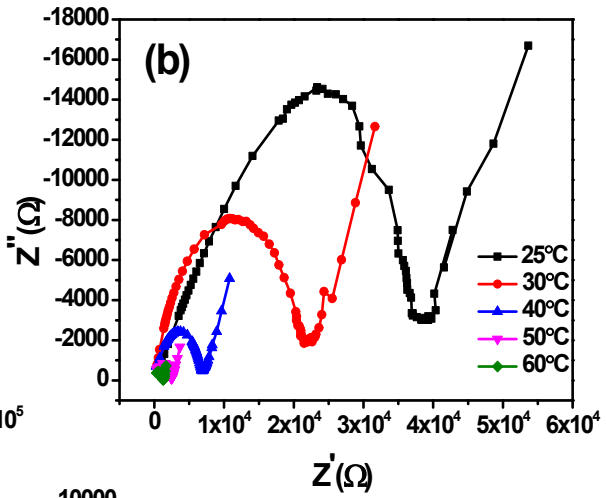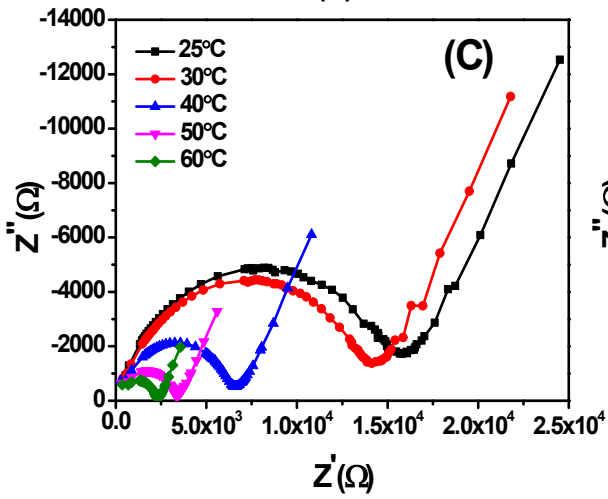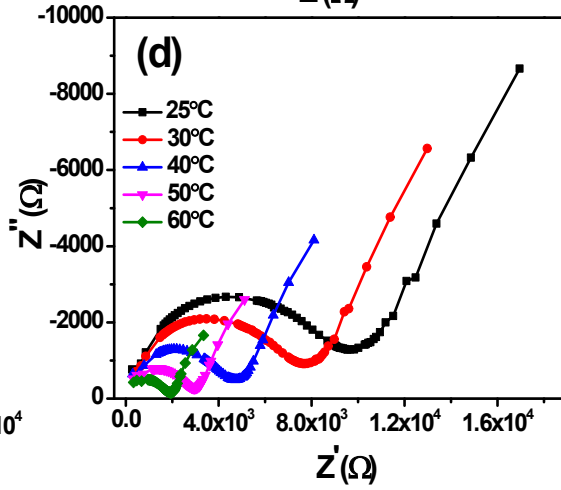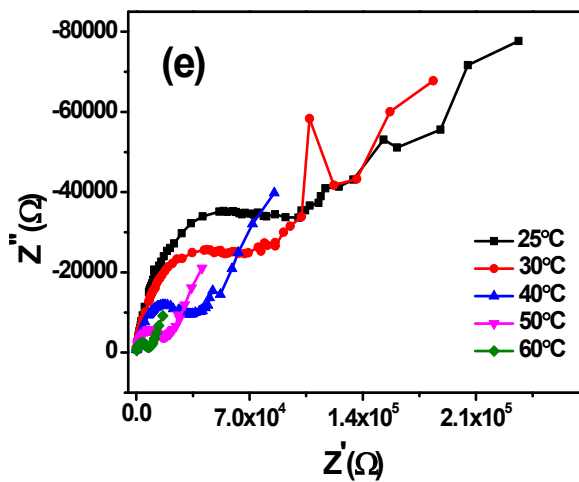

**Figure S4.** Variation of real parts of impedance versus imaginary parts of impedance of (a) MAPbI<sub>3</sub> (b) MAPbI<sub>3</sub>@0.5rGO (c) MAPbI<sub>3</sub>@1rGO (d) MAPbI<sub>3</sub>@5rGO (e) MAPbI<sub>3</sub>@7rGO at different temperature.

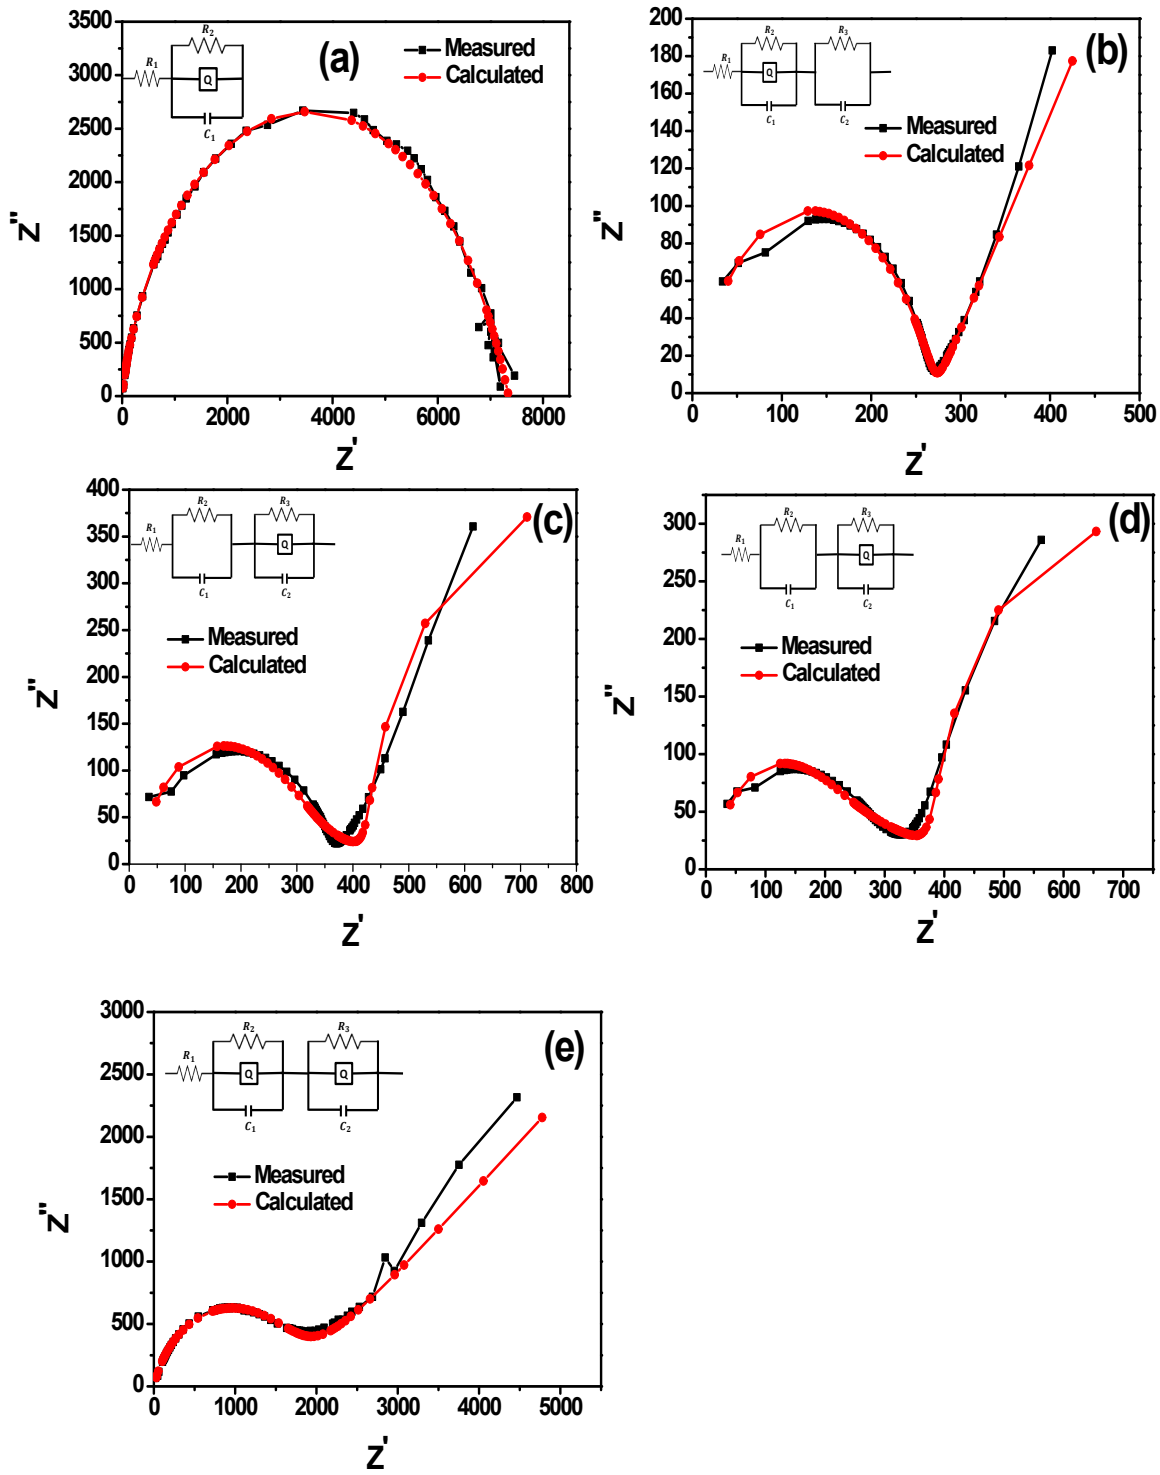

**Figure S5.** Variation of real parts of impedance versus imaginary parts of impedance of (a) MAPbI<sub>3</sub> (b) MAPbI<sub>3</sub>@0.5rGO (c) MAPbI<sub>3</sub>@1rGO (d) MAPbI<sub>3</sub>@5rGO (e) MAPbI<sub>3</sub>@7rGO at high temperature at 50°C

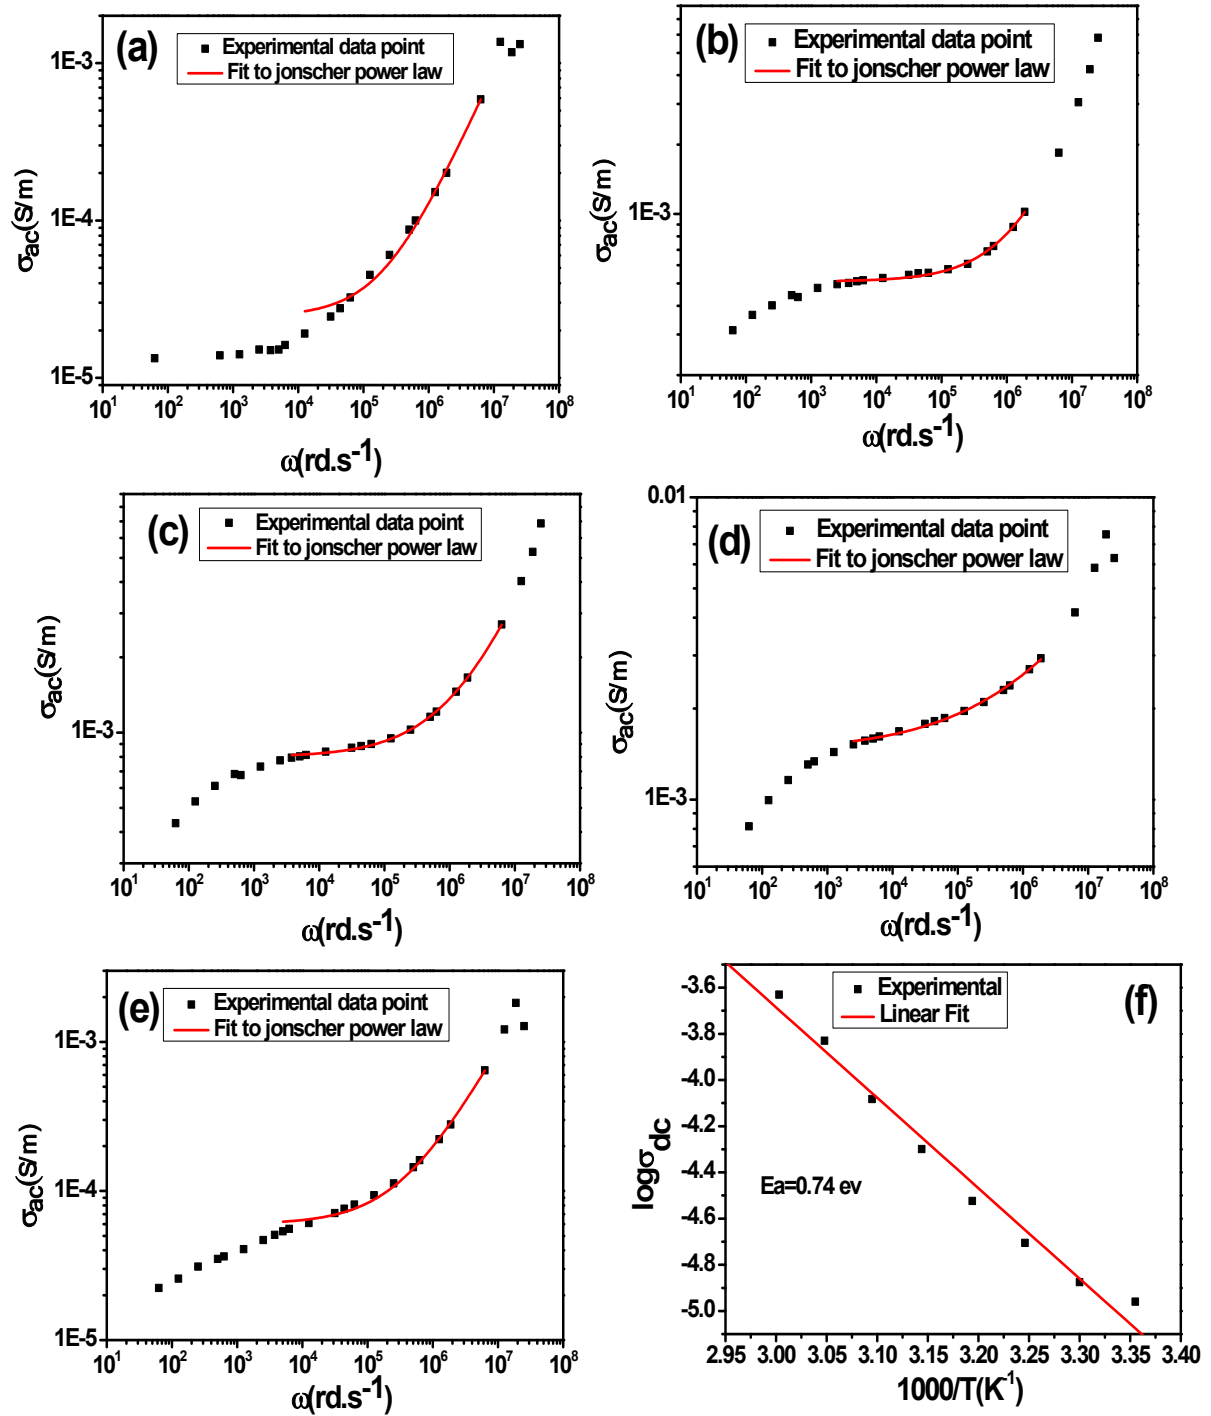



**Figure S6.** Jonscher's power law fitting of ac conductivity as a function of the frequency of (a) MAPbI<sub>3</sub> (b)MAPbI<sub>3</sub>@rGO (c)MAPbI<sub>3</sub>@rGO (d)MAPbI<sub>3</sub>@rGO (e)MAPbI<sub>3</sub>@rGO (g) Linear fitting between the logarithm of dc conductivity and 1000/T(inverse of kelvin).

**Table T1.** Exponent ('n') value and Activation energy from Jonscher's power law of parent and composite material

| Sample                     | 'n' values | Activation Energy(eV) | Relaxation Time for complex part of impedance (micro sec) |
|----------------------------|------------|-----------------------|-----------------------------------------------------------|
| MAPbI <sub>3</sub>         | 0.91       | 0.74                  | 318.3                                                     |
| MAPbI <sub>3</sub> @0.5rGO | 0.77       | 0.81                  | 2.65                                                      |
| MAPbI <sub>3</sub> @1rGO   | 0.65       | 0.47                  | 1.98                                                      |
| MAPbI <sub>3</sub> @5rGO   | 0.38       | 0.41                  | 0.79                                                      |
| MAPbI <sub>3</sub> @@7rGO  | 0.78       | 0.63                  | 15.9                                                      |

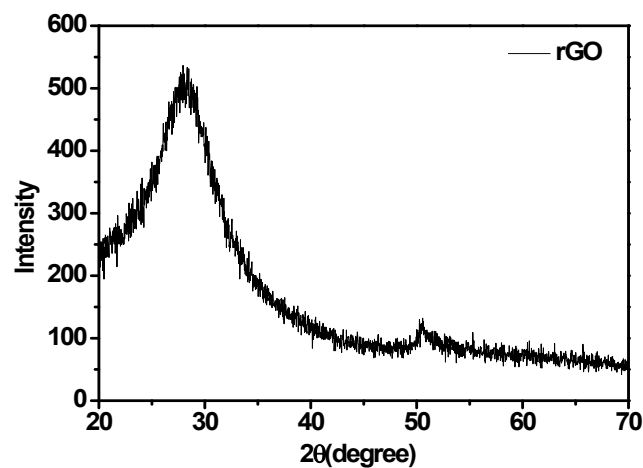

**Figure S7 :** XRD pattern of reduced graphene oxide

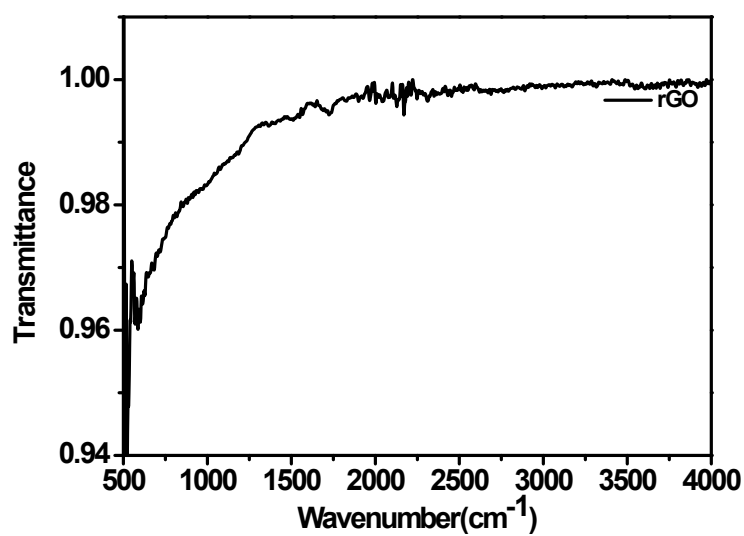

Figure S8 : FTIR Spectroscopy of reduced graphene oxide

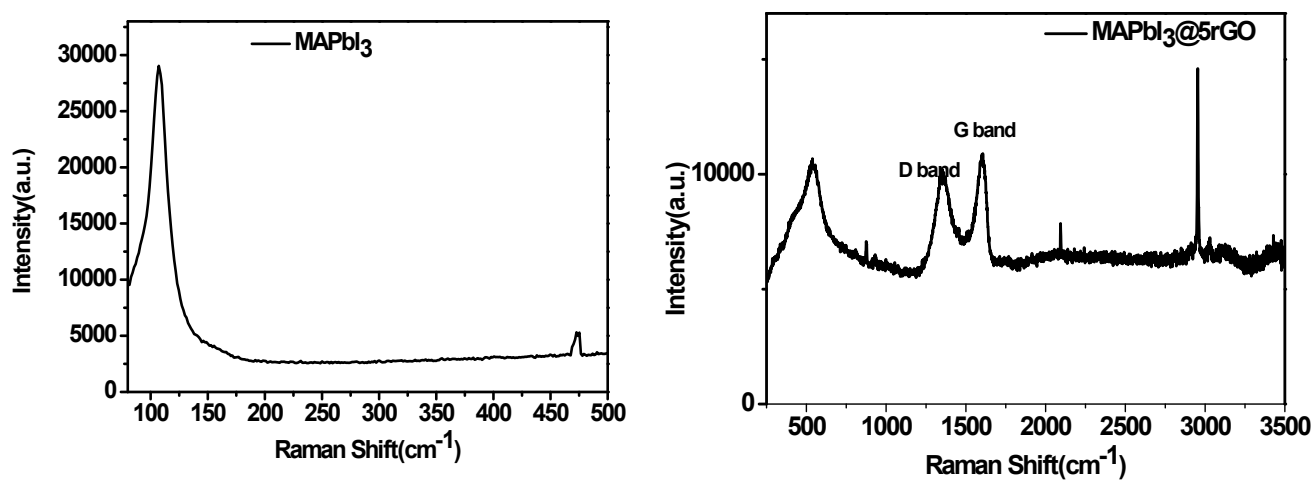

Figure S9. Raman Spectroscopy of MAPbI<sub>3</sub> and MAPbI<sub>3</sub>@5rGO

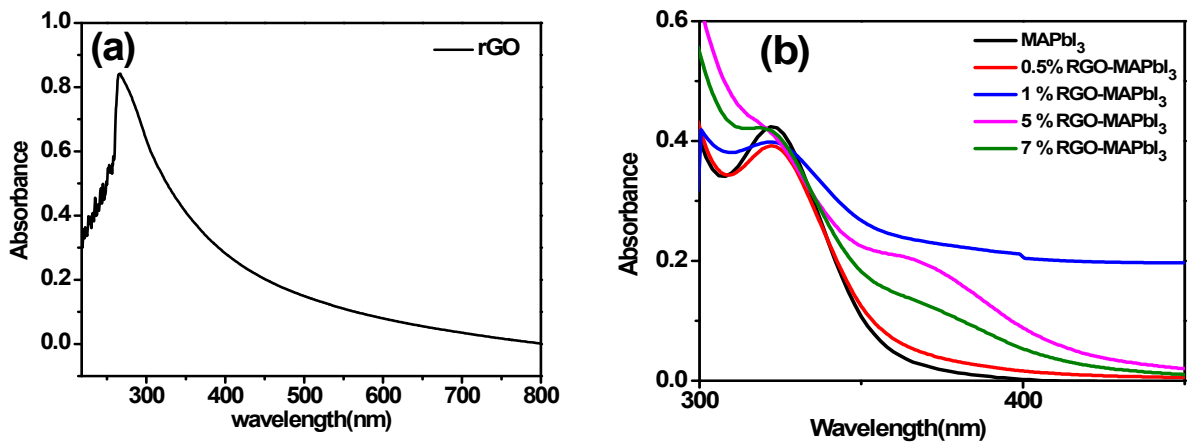

Figure S10. UV Visible spectroscopy of rGO and MAPbI<sub>3</sub>@rGO composites

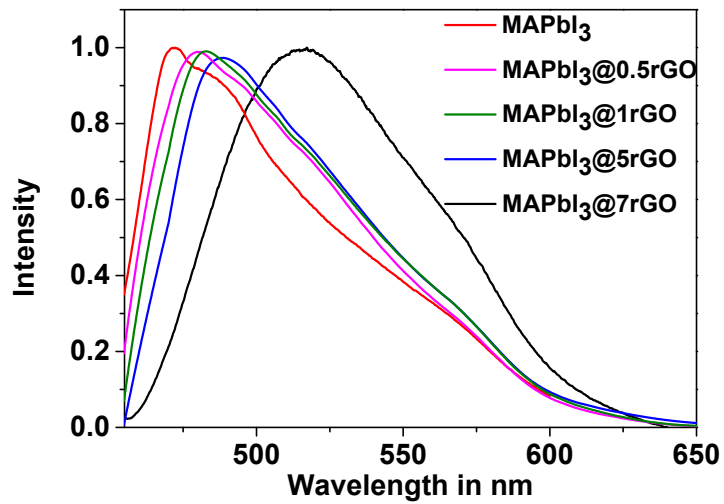

Figure S11. Emission spectra of MAPbI<sub>3</sub> and MAPbI<sub>3</sub>@rGO composites
